# Supplementary material
Source: PubMed Central journal article supplement (PMC4167301)
Supplement: mmc1.pdf [file mmc1.pdf]

*Supplemental Material*

**pH Alters PEG-mediated Fusion of Phosphatidylethanolamine-Containing Vesicles**

Hirak Chakraborty<sup>†</sup>, Tanusree Sengupta<sup>†</sup>, & Barry R. Lentz<sup>\*</sup>

Department of Biochemistry and Biophysics & Program in Molecular and Cellular Biophysics,  
University of North Carolina at Chapel Hill, North Carolina 27599-7260.

<sup>†</sup>Both the authors contributed equally

\*Correspondence: Barry R. Lentz, Department of Biochemistry and Biophysics & Program in Molecular and Cellular Biophysics, University of North Carolina at Chapel Hill, NC 27599.  
Phone: 919-966-5384. Email: [uncbrl@med.unc.edu](mailto:uncbrl@med.unc.edu)

Present Address of Hirak Chakraborty: CSIR-Centre for Cellular and Molecular Biology,  
Hyderabad 500 007, India.

Present Address of Tanusree Sengupta: Department of Biotechnology, Indian Institute of  
Technology Madras, Chennai 600036, India

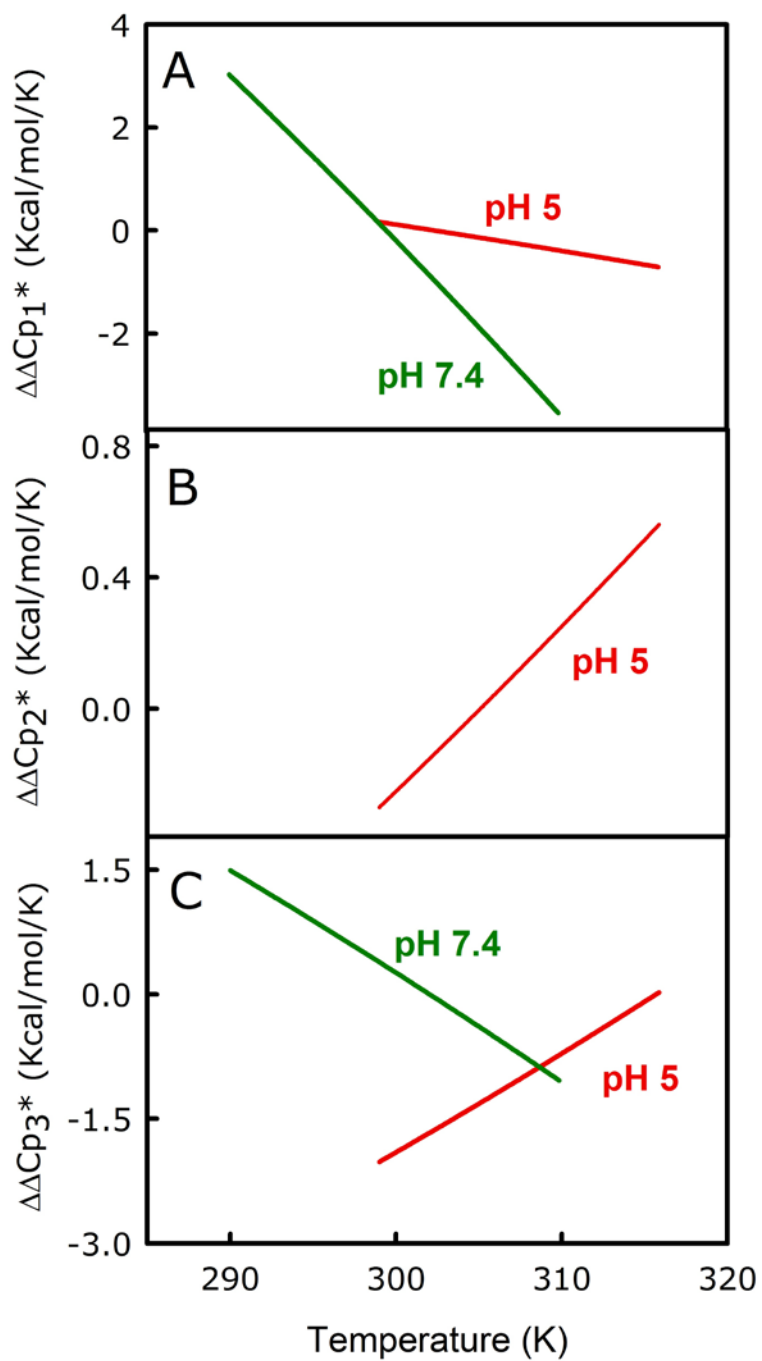

**Figure S1.** Temperature dependence of change in  $\Delta C_{p_i}^*$  ( $\Delta\Delta C_{p_i}^*$ ) in presence of hexadecane for the formation of (A)  $I_1$  state, (B)  $I_2$  state and (C) pore at pH 5.0 (red) and pH 7.4 (green)

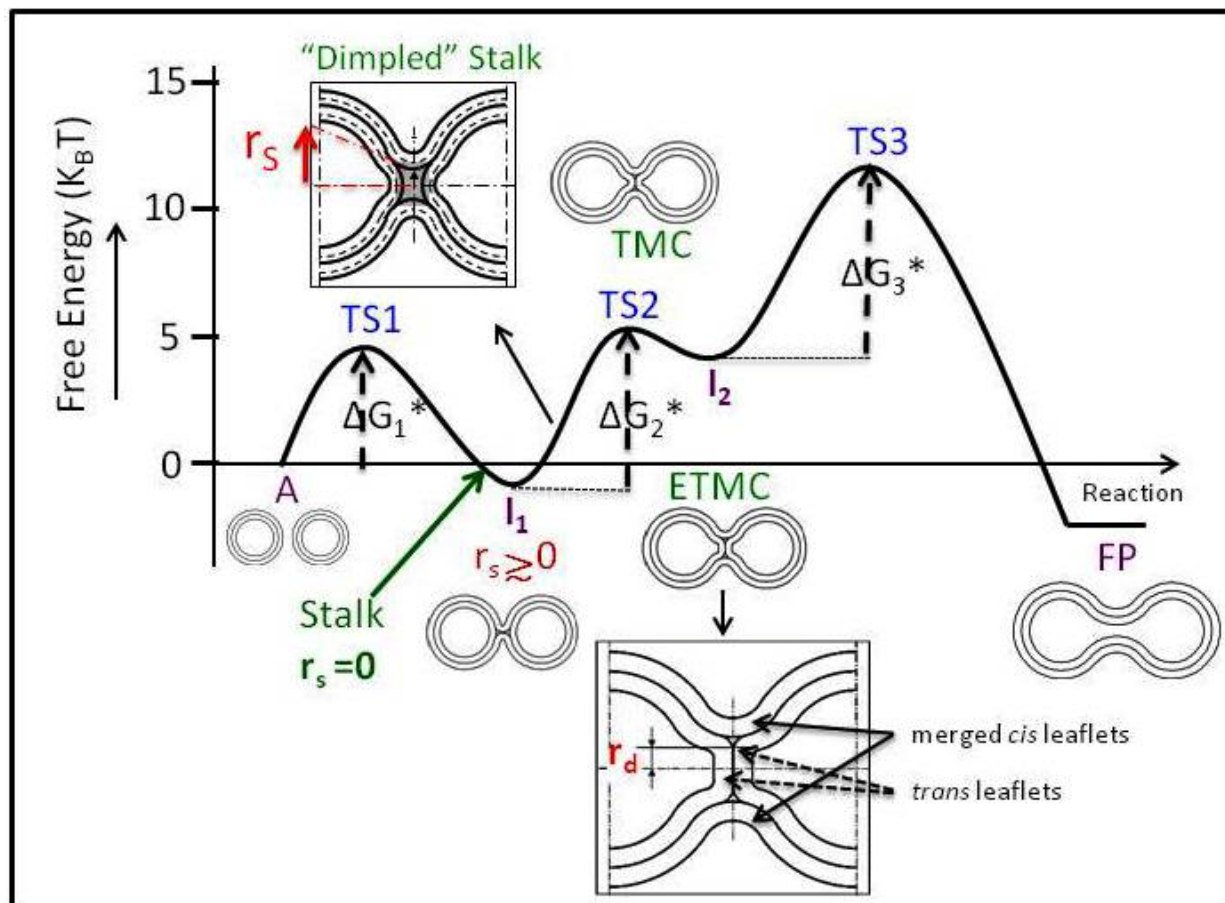

**Figure S2.** Our kinetic model (see Diagram) derives from the expanded-stalk structural model of Siegel for lamellar to non-lamellar phase transitions as applied to membrane fusion. We adapted this model in order to calculate the activation free energy path for the transition of an initial hemi-fused state ( $I_1$ , initial intermediate) between two highly stressed SUVs to a second semi-stable state ( $I_2$ ) from which a fusion pore state (FP) can form. Two free energy minima confirmed the two-step nature of the fusion path as depicted in our model and as detected experimentally. The geometries (labeled in green) of the predicted intermediates are shown for intermediate structures derived from minimization of the free energies of structures at fixed stalk radii (1). Unstable “transition states” are labeled in blue and semi-stable intermediate “states” in purple. The “reaction coordinate” for this diagram is the “stalk radius” ( $r_s$ ) that is illustrated in the “dimpled stalk” diagram and is defined as “0” when the two merged *cis*- leaflets first touch. Since our experiments are performed on vesicle ensembles, each “state” is a thermodynamic state and does not correspond to a single structure. In the context of the large-scale mechanical computation, the first state encountered as  $r_s$  increases is  $I_1$ , which is commonly called the stalk, but occurs at a slightly larger stalk radius than the stalk. The driving force for evolution of the system along its reaction coordinate is a reduction in positive curvature stress that overcomes an increase in unfavorable interstice energy as  $r_s$  increases. “Interstices” are regions at the edge of the hemi-fused region (shaded regions in figure) for which lamellar and non-lamellar lipid

packing conflict. Because water-hydrocarbon interactions are required to compensate for this mismatch, this leads to an unfavorable “interstice” free energy. The evolution from  $I_1$  to  $I_2$  proceeds through a *trans*-membrane contact (TMC) first described by Siegel that provides an unstable transition state to reaching the  $I_2$  semi-stable intermediate, which corresponds to a slight minimum in free energy in a geometry described by Siegel as an “extended *trans*-membrane contact” (ETMC). The depth of the  $I_1$  and  $I_2$  free energy minima as well as the height of the TS2 barrier are all subject to variation with the particular natures of different membrane systems (*e.g.*, composition, pH, vesicle diameter, *etc.*). Thus, the membrane system DOPC/DOPE/SM/CH that we examine here passes through two intermediates when fusing at pH 5 but only one at pH 7.4, as we report here. The TS2 transition state is the only one appropriately predicted by the materials-scale materials model. The first and third steps involve changes from 2-compartment, to hemi-fused, to single-compartment topologies that require molecular rearrangements that cannot be described in terms of materials-scale mechanical models. We have used measured activation thermodynamics for each step and measured membrane structural properties to suggest possible mechanistic models for these molecular rearrangements, and here ask whether these are consistent with observations made in the presence of hexadecane (or VSV-TMD in the companion paper (2)). The  $\Delta G_1^*$  and  $\Delta G_3^*$  magnitudes shown are illustrative of but not exact matches to experimental values obtained for  $k_1$  and  $k_3$ .

*This figure has been adapted from the Supplemental Material of (3) with permission of the publisher (cell Press).*

Table S1. Parameters obtained by fitting the  $\Delta G_i^*$  vs. temperature (Fig. 2) using the equation  $\Delta G_i^* = y_0 + aT + bT^2 + cT^3$  for the fusion of vesicles at pH 5.0 and pH 7.4.

|        |             | $y_0$ | $a$    | $b$                    | $c$                    |
|--------|-------------|-------|--------|------------------------|------------------------|
| pH 5.0 | First step  | -1670 | 16.25  | $-5.27 \times 10^{-2}$ | $5.69 \times 10^{-5}$  |
|        | Second step | -194  | 2.22   | $-8.06 \times 10^{-3}$ | $9.58 \times 10^{-6}$  |
|        | Third step  | -742  | 7.46   | $-2.48 \times 10^{-2}$ | $2.74 \times 10^{-5}$  |
|        |             |       |        |                        |                        |
| pH 7.4 | First step  | 4760  | -47.9  | 0.16                   | $-1.80 \times 10^{-4}$ |
|        | Second step | 1412  | -13.72 | $4.56 \times 10^{-2}$  | $-4.83 \times 10^{-5}$ |

## REFERENCE.

1. Malinin, V. S., and B. R. Lentz. 2004. Energetics of vesicle fusion intermediates: comparison of calculations with observed effects of osmotic and curvature stresses. *Biophys. J.* 86:2951-2964.
2. Sengupta, T., H. Chakraborty, and B. R. Lentz. 2014. The Transmembrane Domain Peptide of Vesicular Stomatitis Virus Promotes Both Intermediate and Pore Formation during PEG-mediated Vesicle Fusion. *Biophys. J.* (Submitted)
3. Chakraborty, H., P. K. Tarafdar, M. J. Bruno, T. Sengupta, and B. R. Lentz. 2012. Activation Thermodynamics of PEG-Mediated Model Membrane Fusion Are Consistent with Mechanistic Models of Stalk and Pore Formation. *Biophys. J.* 102:2751-2760.
